# Supplementary material
Source: publisher site journal article supplement (https://www.dovepress.com/article/434831)
Supplement: Supplementary file 1 [file get_supplementary_file.php]

**Supplemental Table 1.** Rheumatoid Arthritis, lab, and supporting clinical codes

| <b>Rheumatoid Arthritis</b>              |                                                                  |                               |                                                  |
|------------------------------------------|------------------------------------------------------------------|-------------------------------|--------------------------------------------------|
| <b>CPRD Aurum - Medcodes<sup>a</sup></b> |                                                                  | <b>CPRD GOLD - Read codes</b> |                                                  |
| M48361011                                | Rheumatoid carditis                                              | F371200                       | Polyneuropathy in rheumatoid arthritis           |
| M95067016                                | Feltys syndrome                                                  | F396400                       | Myopathy due to rheumatoid arthritis             |
| M1786545019                              | Rheumatoid lung                                                  | G5y8.00                       | Rheumatoid myocarditis                           |
| M16911000006114                          | Rheumatoid arthritis with organ / system involvement             | G5yA.00                       | Rheumatoid carditis                              |
| M149911000006117                         | Seropositive rheumatoid arthritis                                | H570.00                       | Rheumatoid lung                                  |
| M162041000006117                         | Rheumatoid arthritis of distal interphalangeal joint of finger   | N04..00                       | Rheumatoid arthritis and other inflammatory      |
| M162051000006115                         | Rheumatoid arthritis of distal radio-ulnar joint                 | N040.00                       | Rheumatoid arthritis                             |
| M162081000006111                         | Rheumatoid arthritis of interphalangeal joint of toe             | N040000                       | Rheumatoid arthritis of cervical spine           |
| M162101000006115                         | Rheumatoid arthritis of lesser metatarsophalangeal joint         | N040100                       | Other rheumatoid arthritis of spine              |
| M162111000006117                         | Rheumatoid arthritis of metacarpophalangeal joint                | N040200                       | Rheumatoid arthritis of shoulder                 |
| M162131000006111                         | Rheumatoid arthritis of proximal interphalangeal joint of finger | N040300                       | Rheumatoid arthritis of sternoclavicular joint   |
| M162141000006118                         | Rheumatoid arthritis of sacroiliac joint                         | N040400                       | Rheumatoid arthritis of acromioclavicular joint  |
| M162191000006110                         | Rheumatoid arthritis of tibio-fibular joint                      | N040500                       | Rheumatoid arthritis of elbow                    |
| M162231000006117                         | Rheumatoid arthropathy + visceral/systemic involvement NOS       | N040600                       | Rheumatoid arthritis of distal radio-ulnar joint |
| M162301000006117                         | Rheumatoid lung                                                  | N040700                       | Rheumatoid arthritis of wrist                    |
| M162341000006115                         | Rheumatoid nodule                                                | N040800                       | Rheumatoid arthritis of MCP joint                |
| M168751000006115                         | Rheumatoid arthritis and other inflammatory polyarthropathy      | N040900                       | Rheumatoid arthritis of PIP joint of finger      |
| M168761000006118                         | Rheumatoid arthritis of 1st metatarsophalangeal joint            | N040A00                       | Rheumatoid arthritis of DIP joint of finger      |
| M215551000000114                         | Sero negative polyarthrititis                                    | N040B00                       | Rheumatoid arthritis of hip                      |
| M219271000000117                         | Seronegative arthritis                                           | N040C00                       | Rheumatoid arthritis of sacro-iliac joint        |
| M424981000006114                         | [X]Rheumatoid arthritis+involvement/other organs or systems      | N040D00                       | Rheumatoid arthritis of knee                     |
| M856221000006115                         | Sero-negative polyarthrititis                                    | N040E00                       | Rheumatoid arthritis of tibio-fibular joint      |
| M889731000006111                         | Rheumatoid arthritis NOS                                         | N040F00                       | Rheumatoid arthritis of ankle                    |
| M905301000006114                         | [RFC] Rheumatoid                                                 | N040G00                       | Rheumatoid arthritis of subtalar joint           |
| M909191000006119                         | [RFC] Rheumatoid arthritis                                       | N040H00                       | Rheumatoid arthritis of talonavicular joint      |
| M2670341000006112                        | Diffuse interstitial rheumatoid disease of lung                  | N040J00                       | Rheumatoid arthritis of other tarsal joint       |
| M3042571000006112                        | Subcutaneous rheumatoid nodule                                   | N040K00                       | Rheumatoid arthritis of 1st MTP joint            |

|                                          |                                                         |                               |                                                           |
|------------------------------------------|---------------------------------------------------------|-------------------------------|-----------------------------------------------------------|
| M3042581000006110                        | Chronic rheumatoid nodular fibrosis                     | N040L00                       | Rheumatoid arthritis of lesser MTP joint                  |
| M3428891000006116                        | Rheumatoid arthritis - leukopenia AND splenomegaly      | N040M00                       | Rheumatoid arthritis of IP joint of toe                   |
| M3428901000006117                        | Rheumatoid arthritis - leucopenia AND splenomegaly      | N040N00                       | Rheumatoid vasculitis                                     |
| M3636521000006117                        | Chronic rheumatic arthritis                             | N040P00                       | Seronegative rheumatoid arthritis                         |
| M3636541000006112                        | RA - Rheumatoid arthritis                               | N040Q00                       | Rheumatoid bursitis                                       |
| M3636551000006114                        | Rheumatoid disease                                      | N040R00                       | Rheumatoid nodule                                         |
| M3636561000006111                        | RhA - Rheumatoid arthritis                              | N040S00                       | Rheumatoid arthritis - multiple joint                     |
| M4809101000006114                        | Rheumatoid arthritis of distal radioulnar joint         | N040T00                       | Flare of rheumatoid arthritis                             |
| M4809181000006117                        | Rheumatoid arthritis of tibiofibular joint              | N042.00                       | Other rheumatoid arthropathy + visceral/systemic          |
| M4809221000006114                        | Rheumatoid arthritis of first metatarsophalangeal joint | N042100                       | Rheumatoid lung disease                                   |
| M5721431000006114                        | Rheumatoid arthritis of multiple joints                 | N042200                       | Rheumatoid nodule                                         |
| M6608771000006110                        | Rheumatoid pneumoconiosis                               | N042z00                       | Rheumatoid arthropathy + visceral/systemic                |
| M7099641000006113                        | Rheumatoid arthritis of foot                            | N047.00                       | Seropositive erosive rheumatoid arthritis                 |
| M11903911000006111                       | Seropositive erosive rheumatoid arthritis               | N04X.00                       | Seropositive rheumatoid arthritis, unspecified            |
|                                          |                                                         | N04y.00                       | Other specified inflammatory polyarthropathy              |
|                                          |                                                         | N04y000                       | Rheumatoid lung                                           |
|                                          |                                                         | N04y012                       | Fibrosing alveolitis associated with rheumatoid arthritis |
|                                          |                                                         | N04y100                       | Sero negative arthritis                                   |
|                                          |                                                         | N04y111                       | Sero negative polyarthrits                                |
|                                          |                                                         | N04yz00                       | Other specified inflammatory polyarthropathy NOS          |
|                                          |                                                         | N04z.00                       | Inflammatory polyarthropathy NOS                          |
|                                          |                                                         | Nyu1000                       | [X]Rheumatoid arthritis+involvement/other organs or       |
|                                          |                                                         | Nyu1100                       | [X]Other seropositive rheumatoid arthritis                |
|                                          |                                                         | Nyu1200                       | [X]Other specified rheumatoid arthritis                   |
|                                          |                                                         | Nyu1G00                       | [X]Seropositive rheumatoid arthritis, unspecified         |
| <b>Labs</b>                              |                                                         |                               |                                                           |
| <b>CPRD Aurum - Medcodes<sup>a</sup></b> |                                                         | <b>CPRD GOLD - Read codes</b> |                                                           |
| M257899015                               | Rheumatoid arthritis latex test                         | 43F1.00                       | Rheumatoid factor positive                                |
| M164661000006119                         | Rose-Waaler assay                                       | 43F2.00                       | Rheumatoid factor negative                                |
| M218371000000115                         | Rose Waaler test                                        | 43FZ.00                       | Rheumatoid factor NOS                                     |

|                   |                                                          |         |                                                        |
|-------------------|----------------------------------------------------------|---------|--------------------------------------------------------|
| M8410291000006111 | RA latex test                                            | 42B6.00 | Erythrocyte sedimentation rate                         |
| M8370761000006113 | Rose Waaler test                                         | 42B6000 | ESR abnormal                                           |
| M8408701000006114 | Rose Waaler test - sheep cells                           | 42B6100 | ESR low                                                |
| M8408711000006112 | Rose Waaler test                                         | 42B6200 | ESR normal                                             |
| M457892010        | Fluid rheumatoid factor level                            | 42B6300 | ESR raised                                             |
| M2533215010       | Rheumatoid factor IgG level                              | 42B6z00 | Erythrocyte sediment rate NOS                          |
| M2533290016       | IgA rheumatoid factor level                              | 43F..00 | Rheumatoid factor                                      |
| M1488677013       | Rheumatoid factor screening test                         | 43F..12 | Rose Waaler test                                       |
| M162261000006114  | Rheumatoid factor                                        | 43F3.00 | R.A. latex test                                        |
| M975681000006118  | Rheumatoid factor IgM level                              | 43F4.00 | Rose Waaler test - sheep cells                         |
| M110111000006117  | Test request : Rheumatoid Factor                         | 43F5.00 | Serum rheumatoid antigen level                         |
| M2159844013       | Rheumatoid arthritis particle agglutination test         | 43F6.00 | Fluid rheumatoid factor level                          |
| M162221000006115  | Rheumatoid arthritis screening test                      | 43F7.00 | Rheumatoid factor screening test                       |
| M257905015        | Serum rheumatoid antigen level                           | 43F8.00 | Serum rheumatoid antibody level                        |
| M1488915014       | Serum rheumatoid antibody level                          | 43F9.00 | Rheumatoid factor IgG level                            |
| M1824341000006113 | Test request : Serum rheumatoid antibody level           | 43FA.00 | Rheumatoid factor IgM level                            |
| M257908018        | Rheumatoid factor NOS                                    | 43FB.00 | IgA rheumatoid factor level                            |
| M457892010        | Fluid rheumatoid factor level                            | 43a2.00 | Human leucocyte antigen antibody level                 |
| M257896010        | Rheumatoid factor positive                               | 43b9.00 | Rheumatoid arthritis particle agglutination test       |
| M257897018        | Rheumatoid factor negative                               | 43c5.00 | HLA B27 antigen screening test                         |
| M2533215010       | Rheumatoid factor IgG level                              | 43c6.00 | Rheumatoid arthritis screening test                    |
| M2533290016       | IgA rheumatoid factor level                              | 43c9000 | HEp-2 cell antinuclear antibody screening test         |
| M1488677013       | Rheumatoid factor screening test                         | 43cG.00 | Human leucocyte antigen B27 positive                   |
| M162261000006114  | Rheumatoid factor                                        | 43cH.00 | Human leucocyte antigen B27 negative                   |
| M975681000006118  | Rheumatoid factor IgM level                              | 43mZ.00 | Anti-cyclic citrullinated peptide antibody level       |
| M110111000006117  | Test request : Rheumatoid Factor                         | 43mf.00 | Antinuclear factor IgG level                           |
| M2159769019       | Anti-cyclic citrullinated peptide antibody level         | 43mg.00 | Antinuclear factor IgM level                           |
| M2347561000000116 | Serum anti-cyclic citrullinated peptide antibody level   | 43mh.00 | Antinuclear factor IgA level                           |
| M2347611000000119 | Serum anti-mutated citrullinated vimentin antibody level | 43p..00 | Serum ANA pattern                                      |
| M2347661000000117 | Serum anti-viral citrullinated peptide antibody level    | 43rW.00 | Serum anti-cyclic citrullinated peptide antibody level |

|                   |                                                           |         |                                                       |
|-------------------|-----------------------------------------------------------|---------|-------------------------------------------------------|
| M1696281000006117 | Anti-mutated citrullinated vimentin antibody level        | 43rX.00 | Serum anti-mutated citrullinated vimentin antibody    |
| M216602012        | Serum CRP (C reactive protein) level                      | 43rY.00 | Serum anti-viral citrullinated peptide antibody level |
| M223761000006118  | Plasma C reactive protein                                 | 44CC.00 | Plasma C reactive protein                             |
| M530881000006117  | C-reactive protein abnormal                               | 44CC000 | C reactive protein normal                             |
| M530891000006119  | C-reactive protein normal                                 | 44CC100 | C reactive protein abnormal                           |
| M956721000006115  | Serum C reactive protein                                  | 44CS.00 | Serum C reactive protein level                        |
| M109711000006113  | Test request : C-reactive Protein                         | 4KB..00 | HLA tissue typing                                     |
| M1008881000006111 | C-Reactive Protein                                        | 4KB1.00 | Human leucocyte antigen B27 screen                    |
| M1576041000006115 | C-Reactive Protein                                        | 4KB2.00 | Human leucocyte antigen (HLA) DR antigen typing       |
| M1577941000006117 | C Reactive Protein                                        | ZV7y100 | [V]Screening for rheumatoid arthritis                 |
| M3396911000006119 | CRP - C-reactive protein level                            |         |                                                       |
| M3396921000006110 | C-reactive protein level                                  |         |                                                       |
| M2013981000006114 | Point-of-care C reactive protein                          |         |                                                       |
| M3396901000006117 | C-reactive protein measurement                            |         |                                                       |
| M1990731000006114 | Point-of-care C reactive protein level requested          |         |                                                       |
| M1824331000006115 | Test request : Serum C reactive protein level             |         |                                                       |
| M1485328013       | Serum antinuclear antibody pattern                        |         |                                                       |
| M2533280012       | Antinuclear factor IgA level                              |         |                                                       |
| M975791000006110  | Anti-nuclear IgM antibody level                           |         |                                                       |
| M975781000006112  | Anti-nuclear IgG antibody level                           |         |                                                       |
| M4596771000006114 | Antinuclear factor; positive                              |         |                                                       |
| M8393561000006116 | Serum ANA (antinuclear antibody) pattern                  |         |                                                       |
| M1966121000006110 | HEp-2 (human epithelial type 2) cell antinuclear antibody |         |                                                       |
| M457657016        | HLA (human leucocyte antigen) antibody level              |         |                                                       |
| M458389015        | HLA B27 antigen screening test                            |         |                                                       |
| M2618851017       | HLA DR antigen typing                                     |         |                                                       |
| M829241000006117  | Human leucocyte antigen B27 screen                        |         |                                                       |
| M1138031000000113 | Human leukocyte antigen B27 test positive                 |         |                                                       |
| M1138651000000113 | Human leukocyte antigen B27 test negative                 |         |                                                       |
| M2741181000000114 | HLA (Human Leucocyte Antigen) B27 test negative           |         |                                                       |

|                    |                                                 |  |
|--------------------|-------------------------------------------------|--|
| M2741191000000111  | Human leucocyte antigen B27 test negative       |  |
| M1574911000006110  | Hla B27 Antigens                                |  |
| M11886451000006116 | Human leucocyte antigen B27 test positive       |  |
| M11886461000006119 | HLA (Human Leucocyte Antigen) B27 test positive |  |
| M257300018         | ESR abnormal                                    |  |
| M257301019         | ESR low                                         |  |
| M257302014         | ESR normal                                      |  |
| M257303016         | ESR raised                                      |  |
| M317634012         | [D]Elevated sedimentation rate                  |  |
| M648511000006115   | Erythrocyte sedimentation                       |  |
| M648521000006111   | Erythrocyte sedimentation rate                  |  |
| M4593461000006118  | Erythrocyte sedimentation rate (ESR) abnormal   |  |
| M4593471000006113  | Erythrocyte sedimentation rate abnormal         |  |
| M4593481000006111  | Low erythrocyte sedimentation rate              |  |
| M4593501000006118  | Erythrocyte sedimentation rate (ESR) low        |  |
| M4593511000006115  | Erythrocyte sedimentation rate normal           |  |
| M4593531000006114  | Erythrocyte sedimentation rate (ESR) normal     |  |
| M4593551000006119  | Erythrocyte sedimentation rate (ESR) raised     |  |
| M4593561000006117  | Erythrocyte sedimentation rate raised           |  |
| M6898131000006116  | Erythrocyte sedimentation rate measurement      |  |
| M6898141000006114  | ESR - Erythrocyte sedimentation rate            |  |
| M8404311000006116  | ESR - erythrocyte sedimentation rate            |  |

| Supporting clinical codes |  |  |  |
|---------------------------|--|--|--|
|---------------------------|--|--|--|

| CPRD Aurum - Medcodes <sup>a</sup> |                                                  | CPRD GOLD - Read codes |                                                         |
|------------------------------------|--------------------------------------------------|------------------------|---------------------------------------------------------|
| M1142861000000114                  | Rheumatology disorder annual review              | 1JG..00                | Suspected inflammatory arthritis                        |
| M162381000006114                   | Rheumatol.dis. monitoring NOS                    | 14G1.00                | H/O: rheumatoid arthritis                               |
| M168241000006113                   | Rheumatology follow-up assessment                | 38DZ.00                | Disease activity score in rheumatoid arthritis          |
| M168251000006110                   | Rheumatology initial assessment                  | 38DZ000                | Disease activity score 28 joint in rheumatoid arthritis |
| M168261000006112                   | Rheumatology symptom change                      | 66c0.00                | Disease modifying antirheumatic drug monitoring         |
| M1855981000006118                  | Rheumatology disorder monitoring in primary care | 66H..13                | Rheumatoid arthrit. monitoring                          |

|                   |                                                            |         |                                                     |
|-------------------|------------------------------------------------------------|---------|-----------------------------------------------------|
| M1855991000006115 | Rheumatology disorder monitoring in secondary care         | 66H1.00 | Rheumat. initial assessment                         |
| M1875561000006119 | Rheumatoid arthritis monitoring invitation                 | 66H2.00 | Rheumat. follow-up assessment                       |
| M1875571000006110 | Rheumatoid arthritis monitoring telephone invitation       | 66H3.00 | Rheumat.dis.- joints affected                       |
| M1875581000006114 | Rheumatoid arthritis monitoring telephone                  | 66H4.00 | Rheumat. symptom change                             |
| M1875591000006110 | Rheumatoid arthritis monitoring invitation first letter    | 66H5.00 | Rheumat. drug side effect                           |
| M1875601000006119 | Rheumatoid arthritis monitoring invitation second letter   | 66H6.00 | Rheumat. treatment change                           |
| M1875611000006116 | Rheumatoid arthritis monitoring invitation third letter    | 66H6.11 | Rheumat.dis.treatment changed                       |
| M1880371000006117 | Rheumatoid arthritis resolved                              | 66H7.00 | Rheumat.dis.treatment started                       |
| M1932121000006116 | 3D study - problems with rheumatoid arthritis management   | 66H8.00 | Rheumat.dis.treatment stopped                       |
| M219011000000115  | Rheumatology disorder monitoring                           | 66H9.00 | Rheumatology management plan given                  |
| M219021000000114  | Rheumatoid arthritis monitoring                            | 66HA.00 | Rheumatology drug monitoring                        |
| M219679100000119  | Rheumatoid arthritis annual review                         | 66HB.00 | Rheumatology disorder annual review                 |
| M227550100000119  | Rheumatoid arthritis monitoring invitation                 | 66HB000 | Rheumatoid arthritis annual review                  |
| M227567100000111  | Rheumatoid arthritis monitoring invitation first letter    | 66HC.00 | Rheumatic disorder annual review invitation         |
| M227571100000112  | Rheumatoid arthritis monitoring invitation second letter   | 66HZ.00 | Rheumatol.dis. monitoring NOS                       |
| M227575100000111  | Rheumatoid arthritis monitoring invitation third letter    | 68F1.00 | Rheumatoid arthritis screen                         |
| M227579100000115  | Rheumatoid arthritis monitoring verbal invitation          | 7P20300 | Delivery of rehabilitation for rheumatoid arthritis |
| M227583100000110  | Rheumatoid arthritis monitoring telephone invitation       | 8H4B.00 | Referred to rheumatologist                          |
| M2474634014       | Health education - rheumatology                            | 8H4k.00 | Referral to rheumatology special interest GP        |
| M2474635010       | Rheumatology management plan given                         | 8HTd.00 | Referral to rheumatology clinic                     |
| M264082100000117  | Rheumatoid Arthritis Impact of Disease questionnaire score | 8HVQ.00 | Private referral to rheumatologist                  |
| M2839291014       | Disease activity score 28 joint in rheumatoid arthritis    | 9b9M.00 | Rheumatology                                        |
| M2842168015       | Disease Activity Score                                     | 9kN0.00 | Pt held DMARD therpy record issued - enhanced       |
| M371261000000111  | Delivery of rehabilitation for rheumatoid arthritis        | 9kN1.00 | Date next DMARD monitor clinic appoint - enhanced   |
| M401537011        | Rheumatism monitoring                                      | 9kN2.00 | Pt held DMARD therpy record update - enhanced       |
| M2548331017       | Inflammatory polyarthropathy                               | 9kN3.00 | DMARD information leaflet given - enhanced services |
| M309841017        | Other specified inflammatory polyarthropathy               | 9kN3.11 | DMARD information leaflet given                     |
| M309849015        | Other specified inflammatory polyarthropathy NOS           | 9kN4.00 | Pt held DMARD therapy record checked - enhanced     |
| M309850015        | Inflammatory polyarthropathy NOS                           | 9kN4.11 | Patient held DMARD therapy record checked           |
| M1488516017       | Rheumatology                                               | 9kN5.00 | DMARD monitoring refer back to secondary care - enh |

|                   |                                                                |         |                                                         |
|-------------------|----------------------------------------------------------------|---------|---------------------------------------------------------|
| M1707311000006111 | Seen by rheumatology nurse specialist                          | 9kN6.00 | DMARD monitored in primary care - enhanced services     |
| M285220012        | Seen in rheumatology clinic                                    | 9kN6.11 | DMARD monitored in primary care                         |
| M448275015        | Seen by rheumatology nurse specialist                          | 9kN7.00 | DMARD monitored in secondary care - enhanced            |
| M1707171000006116 | Referral to rheumatology special interest general practitioner | 9kN7.11 | DMARD monitored in secondary care                       |
| M1716171000006116 | Referral to rheumatology special interest general practitioner | 9kN..00 | DMARD monitoring - enhanced services administration     |
| M1849581000006111 | Referral to rheumatology triage service                        | 9kN8.00 | Disease modifying antirheumatic drug therapy initiated  |
| M2533535012       | Referral to rheumatology clinic                                | 9mM..00 | Rheumatoid arthritis monitoring invitation              |
| M283615017        | Referred to rheumatologist                                     | 9mM0.00 | Rheumatoid arthritis monitoring invitation first letter |
| M284120010        | Private referral to rheumatologist                             | 9mM1.00 | Rheumatoid arthritis monitoring invitation second       |
| M449264012        | Referral to rheumatologist                                     | 9mM2.00 | Rheumatoid arthritis monitoring invitation third letter |
| M5951831000006119 | Referral to rheumatology service                               | 9mM3.00 | Rheumatoid arthritis monitoring verbal invitation       |
| M904931000006116  | Rheumatology referral                                          | 9mM4.00 | Rheumatoid arthritis monitoring telephone invitation    |
| M1680481000006119 | Disease modifying antirheumatic drug monitoring enhanced       | 9NiL.00 | DNA GP disease modifying antirheumatic drug monitor     |
| M1680491000006116 | Patient held disease modifying antirheumatic drug therapy      | 9NiK.00 | DNA hospital DMARD monitoring clinic                    |
| M1680501000006112 | Date of next disease modifying antirheumatic drug monitoring   | 9NkF.00 | Seen in GP DMARD monitoring clinic                      |
| M1680511000006110 | Date of next DMARD monitoring clinic appointment               | 9NkG.00 | Seen in community DMARD monitoring clinic               |
| M1680521000006119 | Patient held disease modifying antirheumatic drug therapy      | 9NkH.00 | Seen in hospital DMARD monitoring clinic                |
| M1680531000006116 | DMARD information leaflet given                                | 9NJq.00 | In-house rheumatology first appointment                 |
| M1680541000006114 | Disease modifying antirheumatic drug information leaflet given | 9NJr.00 | In-house rheumatology follow-up appointment             |
| M1680881000006117 | Did not attend hospital disease monitoring antirheumatic drug  | 9NJs.00 | In-house rheumatology discharge                         |
| M1680891000006119 | Did not attend general practitioner disease modifying          | 9NJw.00 | In-house rheumatology                                   |
| M1681001000006111 | Seen in general practitioner disease modifying antirheumatic   | 9N1O.00 | Seen in rheumatology clinic                             |
| M1681011000006114 | Seen in community disease modifying antirheumatic drug         | 9NIR.00 | Seen by rheumatology nurse specialist                   |
| M1681021000006118 | Seen in hospital disease modifying antirheumatic drug          | 9NIY.00 | Seen by GP with special interest in rheumatology        |
| M1704591000006116 | Patient held disease modifying antirheumatic drug therapy      | 9NNT.00 | Under care of rheumatologist                            |
| M1704601000006112 | Patient held DMARD therapy record checked                      | 9Oe..00 | Community DMARD monitoring administration               |
| M1704611000006110 | DMARD monitoring referred back to secondary care               | 9Oe0.00 | Community DMARD monitoring appointment                  |
| M1704621000006119 | Disease modifying antirheumatic drug monitoring referred back  | 9Oe1.00 | Community DMARD monitoring suspended                    |
| M1715151000006118 | Disease modifying antirheumatic drug monitored in secondary    | 9Oe3.00 | Did not attend for community DMARD monitoring           |
| M1716321000006115 | Disease modifying antirheumatic drug monitored in primary      | 9Oe3.11 | DNA community DMARD monitoring                          |

|                   |                                                              |         |                                                  |
|-------------------|--------------------------------------------------------------|---------|--------------------------------------------------|
| M1741821000006111 | Patient held DMARD therapy record issued                     | 90e4.00 | Community DMARD monitoring record returned to    |
| M1741831000006114 | Patient held DMARD therapy record updated                    | 90e5.00 | Community DMARD monitoring call                  |
| M1741841000006116 | DMARD monitored in primary care                              | 90e5000 | Community DMARD monitoring first letter          |
| M1741851000006119 | DMARD monitored in secondary care                            | 90e5100 | Community DMARD monitoring second letter         |
| M1785581000006117 | Community disease modifying antirheumatic drug monitoring    | 90e5200 | Community DMARD monitoring third letter          |
| M1785601000006110 | Community DMARD (disease modifying antirheumatic drug)       | 90e6.00 | Community DMARD monitoring verbal invitation     |
| M1785611000006113 | Community DMARD (disease modifying antirheumatic drug)       | 90e7.00 | Community DMARD monitoring telephone invitation  |
| M1785621000006117 | Community disease modifying antirheumatic drug monitoring    | N04..11 | Inflammatory polyarthropathy                     |
| M1785631000006119 | Community DMARD (disease modifying antirheumatic drug)       | N04y.00 | Other specified inflammatory polyarthropathy     |
| M1797031000000113 | Community DMARD monitoring first letter                      | N04yz00 | Other specified inflammatory polyarthropathy NOS |
| M1804291000006117 | Community DMARD monitoring bloods taken                      | N04z.00 | Inflammatory polyarthropathy NOS                 |
| M1856741000006119 | Community DMARD monitoring default                           | F371200 | Polyneuropathy in rheumatoid arthritis           |
| M2015371000006111 | GP DMARD monitoring interval                                 | F396400 | Myopathy due to rheumatoid arthritis             |
| M530331000000115  | Did not attend for community disease modifying antirheumatic | ZL5AR00 | Referral to rheumatologist                       |
| M551391000000114  | Community disease modifying antirheumatic drug monitoring    | ZL9AT00 | Seen by rheumatologist                           |
| M557051000000114  | DNA community DMARD monitoring                               | ZL62G00 | Referral to rheumatology nurse specialist        |
| M62961000000115   | Community disease modifying antirheumatic drug monitoring    |         |                                                  |
| M62981000000112   | Community DMARD monitoring suspended                         |         |                                                  |
| M8012821000006118 | Community disease modifying antirheumatic drug monitoring    |         |                                                  |
| M8012841000006113 | Community DMARD (disease modifying antirheumatic drug)       |         |                                                  |
| M8012851000006110 | Community disease modifying antirheumatic drug monitoring    |         |                                                  |
| M8012871000006117 | Community DMARD (disease modifying antirheumatic drug)       |         |                                                  |
| M8194851000006112 | DMARD (disease modifying antirheumatic drug) therapy         |         |                                                  |
| M8216701000006114 | Community DMARD (disease modifying antirheumatic drug)       |         |                                                  |
| M8217771000006117 | Did not attend community DMARD (disease modifying            |         |                                                  |
| M8218641000006118 | Community DMARD (disease modifying antirheumatic drug)       |         |                                                  |
| M8219231000006116 | Community DMARD (disease modifying antirheumatic drug)       |         |                                                  |
| M8257441000006111 | Community DMARD (disease modifying antirheumatic drug)       |         |                                                  |
| M8257651000006110 | Community DMARD (disease modifying antirheumatic drug)       |         |                                                  |
| M850631000006117  | Community disease modifying antirheumatic drug monitoring    |         |                                                  |



|                                                                                                                                                                                                          |                                                        |
|----------------------------------------------------------------------------------------------------------------------------------------------------------------------------------------------------------|--------------------------------------------------------|
| M1140891000000119                                                                                                                                                                                        | Rheumatology drug monitoring                           |
| M1157471000000118                                                                                                                                                                                        | Disease modifying antirheumatic drug therapy initiated |
| M1680891000006119                                                                                                                                                                                        | Did not attend general practitioner disease modifying  |
| M168271000006117                                                                                                                                                                                         | Rheumat. treatment change                              |
| M168291000006116                                                                                                                                                                                         | Rheumat.dis.treatment changed                          |
| M168301000006115                                                                                                                                                                                         | Rheumatology disorder treatment started                |
| M1708161000006110                                                                                                                                                                                        | Rheumatology drug monitoring - Leflunomide             |
| M1708171000006115                                                                                                                                                                                        | Rheumatology drug monitoring - Etanercept              |
| M1708181000006117                                                                                                                                                                                        | Rheumatology drug monitoring - Adalimumab              |
| M1708191000006119                                                                                                                                                                                        | Rheumatology drug monitoring - Infliximab              |
| M1780387011                                                                                                                                                                                              | Disease modifying antirheumatic drug monitoring        |
| M1786881000006112                                                                                                                                                                                        | Rheumatology drug monitoring - Sulfasalazine           |
| M1786891000006110                                                                                                                                                                                        | Rheumatology drug monitoring - Methotrexate            |
| M1824301000006111                                                                                                                                                                                        | Rheumatology drug monitoring - Auranofin               |
| M1824311000006114                                                                                                                                                                                        | Rheumatology drug monitoring - Sodium Aurothiomalate   |
| M1957801000006119                                                                                                                                                                                        | Rheumatology drug monitoring - Mycophenolate mofetil   |
| M264822012                                                                                                                                                                                               | Rheumat.dis.treatment stopped                          |
| M987361000006118                                                                                                                                                                                         | Rheumatology drug monitoring                           |
| M987371000006113                                                                                                                                                                                         | Rheumatology drug monitoring - Cyclosporin             |
| M987381000006111                                                                                                                                                                                         | Rheumatology drug monitoring - Hydroxychloroquine      |
| M987391000006114                                                                                                                                                                                         | Rheumatology drug monitoring - Azathioprine            |
| M987401000006111                                                                                                                                                                                         | Rheumatology drug monitoring - d-penicillamine         |
| M987411000006114                                                                                                                                                                                         | Rheumatology drug monitoring - Cyclophosphamide        |
| <p><sup>a</sup> 'M' prefix has been added to the Medcodes to prevent the code from being corrupted when opened in certain programs. This prefix must be removed before using the codes in CPRD Aurum</p> |                                                        |
